# Supplementary material
Source: MDPI journal article supplement (https://www.mdpi.com/2073-4395/11/9/1878)
Supplement: s1 [file s1]

**Table S2: Comparison of model performance in terms of MAPE in testing sets**

| Time Series      | Date        | Actual   | ARIMA        | ARIMA<br>Intervention | SVR          | SVR<br>Intervention | ANN          | ANN<br>Intervention |
|------------------|-------------|----------|--------------|-----------------------|--------------|---------------------|--------------|---------------------|
| Supply           | 24-06-20    | 148.80   | 141.25       | 150.00                | 137.36       | 156.59              | 150.52       | 137.22              |
|                  | 25-06-20    | 69.30    | 140.96       | 139.90                | 135.01       | 132.09              | 110.68       | 123.09              |
|                  | 26-06-20    | 116.90   | 140.80       | 135.44                | 133.77       | 127.05              | 129.74       | 134.03              |
|                  | 27-06-20    | 119.60   | 140.72       | 127.08                | 133.11       | 121.03              | 139.26       | 135.14              |
|                  | 28-06-20    | 122.70   | 140.68       | 126.71                | 132.76       | 127.42              | 143.82       | 134.92              |
|                  | 29-06-20    | 90.20    | 140.65       | 128.52                | 132.58       | 127.15              | 133.19       | 134.81              |
|                  | 30-06-20    | 95.10    | 140.64       | 131.71                | 132.48       | 137.42              | 142.64       | 134.75              |
|                  | <b>MAPE</b> |          | <b>37.86</b> | <b>31.81</b>          | <b>33.12</b> | <b>29.02</b>        | <b>29.86</b> | <b>27.84</b>        |
| Maximum<br>Price | 24-06-20    | 32000.00 | 29392.68     | 29128.35              | 29423.38     | 28319.06            | 30746.66     | 33310.05            |
|                  | 25-06-20    | 32000.00 | 29392.68     | 27222.57              | 29423.38     | 27583.36            | 31216.39     | 34007.99            |
|                  | 26-06-20    | 32000.00 | 29392.68     | 26672.38              | 29423.38     | 26840.22            | 29712.92     | 34101.91            |
|                  | 27-06-20    | 32000.00 | 29392.68     | 25032.85              | 29423.38     | 27377.36            | 29919.05     | 33768.78            |
|                  | 28-06-20    | 32000.00 | 29392.68     | 26621.59              | 29423.38     | 28028.34            | 29927.18     | 33317.47            |
|                  | 29-06-20    | 40000.00 | 29392.68     | 24837.62              | 29423.38     | 28397.11            | 28910.04     | 33046.35            |
|                  | 30-06-20    | 36000.00 | 29392.68     | 27457.40              | 29423.38     | 28302.23            | 30068.36     | 33070.01            |
|                  | <b>MAPE</b> |          | <b>10.77</b> | <b>10.68</b>          | <b>10.09</b> | <b>10.02</b>        | <b>8.98</b>  | <b>6.51</b>         |
| Minimum<br>price | 24-06-20    | 16000.00 | 12871.78     | 12949.15              | 12993.43     | 15471.25            | 12341.50     | 11521.20            |
|                  | 25-06-20    | 12000.00 | 12871.78     | 12130.63              | 12993.43     | 14608.72            | 11278.90     | 12202.30            |
|                  | 26-06-20    | 12000.00 | 12871.78     | 12593.79              | 12993.43     | 14841.69            | 11293.00     | 13014.60            |
|                  | 27-06-20    | 15000.00 | 12871.78     | 13702.10              | 12993.43     | 15395.47            | 12138.00     | 13231.10            |
|                  | 28-06-20    | 15000.00 | 12871.78     | 13699.18              | 12993.43     | 15269.84            | 13483.30     | 12928.70            |
|                  | 29-06-20    | 15000.00 | 12871.78     | 13018.69              | 12993.43     | 15225.10            | 13494.50     | 13516.80            |
|                  | 30-06-20    | 20000.00 | 12871.78     | 12540.65              | 12993.43     | 15266.90            | 13300.80     | 13665.50            |
|                  | <b>MAPE</b> |          | <b>16.04</b> | <b>15.78</b>          | <b>15.35</b> | <b>15.04</b>        | <b>13.28</b> | <b>11.18</b>        |
| Modal<br>price   | 24-06-20    | 24000.00 | 21355.97     | 20217.38              | 21367.56     | 21765.05            | 20756.38     | 22039.47            |
|                  | 25-06-20    | 22000.00 | 21355.97     | 18181.71              | 21367.56     | 21684.10            | 21511.69     | 21343.19            |
|                  | 26-06-20    | 22000.00 | 21355.97     | 16354.11              | 21367.56     | 21724.75            | 21421.79     | 21521.50            |
|                  | 27-06-20    | 23000.00 | 21355.97     | 14450.42              | 21367.56     | 21762.24            | 21483.31     | 21059.35            |

|  |             |          |              |              |             |             |             |             |
|--|-------------|----------|--------------|--------------|-------------|-------------|-------------|-------------|
|  | 28-06-20    | 23000.00 | 21355.97     | 12459.04     | 21367.56    | 21763.60    | 21597.70    | 21140.57    |
|  | 29-06-20    | 24000.00 | 21355.97     | 11762.63     | 21367.56    | 21753.70    | 21674.20    | 21877.67    |
|  | 30-06-20    | 30000.00 | 21355.97     | 12314.80     | 21367.56    | 21749.94    | 21681.72    | 21300.67    |
|  | <b>MAPE</b> |          | <b>10.14</b> | <b>10.04</b> | <b>9.78</b> | <b>9.67</b> | <b>9.76</b> | <b>8.52</b> |
